# Supplementary figures and images for: Protein detection using aqueous/LC interfaces decorated with a novel poly(N-isopropyl acrylamide) block liquid crystalline polymer
Source: Royal Society of Chemistry journal article supplement (doi:10.1039/c3ra42472c), 2013-01-01

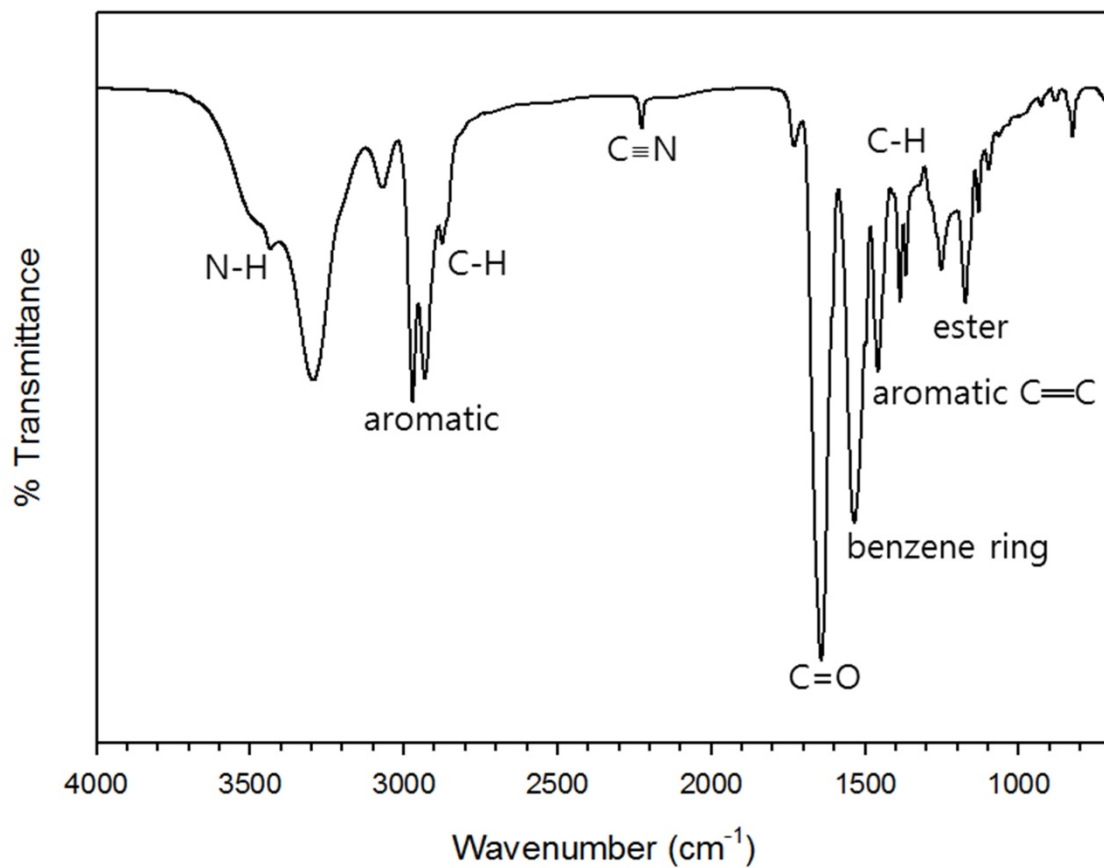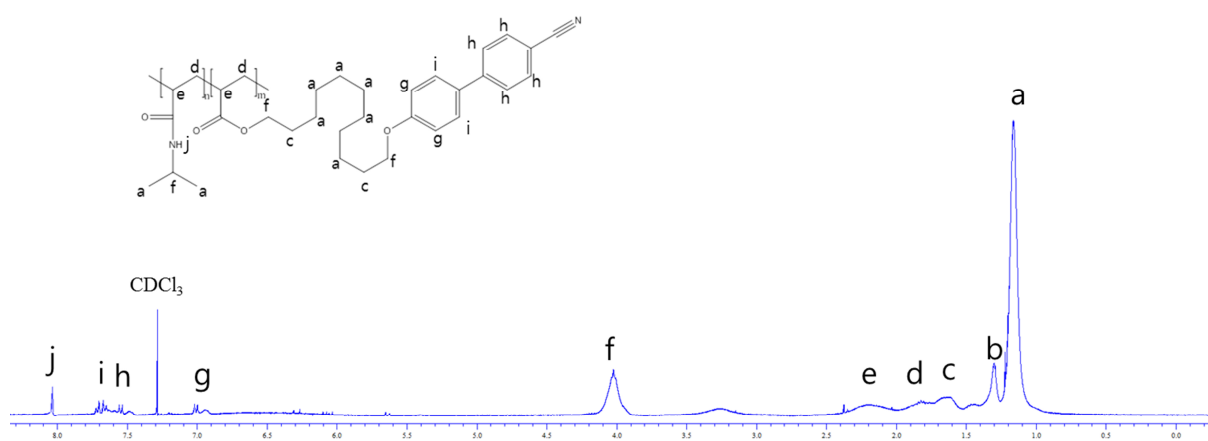

Supplement: c3ra42472c.pdf [file c3ra42472c.pdf]
